# Supplementary material
Source: Research Square preprint supplement (doi:10.21203/rs.3.rs-9056848/v1)
Supplement: Supplementary file 1 [file a535335f8d209d6e4f0f727a.docx]

**Sediment–biota coupling of macro- and trace elements with limited morphological integration in *Ruditapes decussatus***

**Authors:** Ali Annabia, Walid Ben Ameura, Carola Mazzoli b, Francesca Falco b*, Giorgio Mancinellic,d,e

**Authors e-mails:**

**Ali Annab:** [**medannabi@yahoo.fr**](mailto:medannabi@yahoo.fr)**;** [**Ali.Annabi@fsg.rnu.tn**](mailto:Ali.Annabi@fsg.rnu.tn)

**Walid BenAmeur :** [**Benameurwalid@gmail.com**](mailto:Benameurwalid@gmail.com)

**Carola Mazzoli:** [**carolamazzoli@cnr.it**](mailto:carolamazzoli@cnr.it)

**Giorgio Mancinelli :** [**giorgio.mancinelli@unisalento.it**](mailto:giorgio.mancinelli@unisalento.it)

**Authors Affiliation:**

a: Laboratoire: Ecologie de la Faune Terrestre (LR24ES17/ CDR2024ES04), Département des sciences de la vie, Faculté des Sciences de Gabes, Université de Gabes, Gabes, Tunisia.

b: Marine and Environmental Ecophysiology Laboratory, IRBIM, Mazara del Vallo (TP), Italy.

c: Department of Biological and Environmental Sciences and Technologies (DiSTeBA), University of Salento, 73100 Lecce, Italy

d: National Research Council (CNR), Institute of Biological Resources and Marine Biotechnologies (IRBIM), 08040 Lesina, Italy

e:CoNISMa, Consorzio Nazionale Interuniversitario per le Scienze del Mare, 00196 Roma, Italy;

***Corresponding authors: Francesca Falco**

Laboratoire : Marine and Environmental Ecophysiology Laboratory, IRBIM, Mazara del Vallo, Italy. Email: [francesca.falco@cnr.it](mailto:francesca.falco@cnr.it)

**Supplementary Materials**

**Table S1** Summary of inter-location bivariate comparisons after PERMANOVA analyses for macroelements and trace metals in sediments (A) and in the shells (B) and soft tissues (C) of *Ruditapes decussatus*. Significant differences (Montecarlo *P*< 0.05) are reported in bold.

| **A) Sediment** |  | | |  | | |
| --- | --- | --- | --- | --- | --- | --- |
|  | **Macroelements** | | | **Trace metals** | | |
|  | Permutations | t | *P*(MC) | Permutations | t | *P*(MC) |
| Bizerte, Gargour | 10 | 1.19 | 0.32 | 10 | 2.9 | **0.02** |
| Bizerte, Hchichina | 10 | 3.49 | **0.02** | 10 | 5.41 | **0.01** |
| Bizerte, Zarrat | 10 | 1.94 | 0.11 | 10 | 1.22 | 0.28 |
| Bizerte, Djerba | 10 | 0.73 | 0.56 | 10 | 2.43 | **0.04** |
| Gargour, Hchichina | 10 | 5.8 | **0.003** | 10 | 7.3 | **0.001** |
| Gargour, Zarrat | 10 | 2.8 | **0.04** | 10 | 1.77 | 0.1 |
| Gargour, Djerba | 10 | 1.48 | 0.2 | 10 | 2.22 | **0.04** |
| Hchichina, Zarrat | 10 | 1.23 | 0.28 | 10 | 4.87 | **0.01** |
| Hchichina, Djerba | 10 | 2.42 | 0.06 | 10 | 5.29 | **0.01** |
| Zarrat, Djerba | 10 | 1.31 | 0.26 | 10 | 1.01 | 0.39 |

| **B) Shell** |  | | |  | | |
| --- | --- | --- | --- | --- | --- | --- |
|  | **Macroelements** | | | **Trace elements** | | |
|  | Permutations | t | *P*(MC) | Permutations | t | *P*(MC) |
| Bizerte, Gargour | 407 | 1.18 | 0.27 | 406 | 4.04 | **0.002** |
| Bizerte, Hchichina | 409 | 1.55 | 0.17 | 417 | 3.97 | **0.001** |
| Bizerte, Zarrat | 410 | 10.73 | **0.001** | 405 | 7.97 | **0.001** |
| Bizerte, Djerba | 419 | 3.94 | **0.004** | 409 | 5.82 | **0.001** |
| Gargour, Hchichina | 403 | 1.239 | 0.249 | 426 | 6.079 | **0.001** |
| Gargour, Zarrat | 409 | 3.74 | **0.002** | 410 | 6.77 | **0.001** |
| Gargour, Djerba | 400 | 1.45 | 0.2 | 411 | 4.76 | **0.001** |
| Hchichina, Zarrat | 410 | 4.39 | **0.002** | 409 | 8 | **0.001** |
| Hchichina, Djerba | 410 | 2.52 | **0.03** | 404 | 7.02 | **0.001** |
| Zarrat, Djerba | 411 | 9.3 | **0.001** | 407 | 6.66 | **0.001** |

| **C) Soft body** |  | | |  | | |
| --- | --- | --- | --- | --- | --- | --- |
|  | **Macroelements** | | | **Trace elements** | | |
|  | Permutations | t | *P*(MC) | Permutations | t | *P*(MC) |
| Bizerte, Gargour | 996 | 1.3 | 0.22 | 997 | 1.41 | 0.2 |
| Bizerte, Hchichina | 994 | 1.9 | 0.07 | 994 | 3.32 | **0.001** |
| Bizerte, Zarrat | 995 | 3.48 | **0.001** | 992 | 3.92 | **0.003** |
| Bizerte, Djerba | 993 | 0.66 | 0.529 | 995 | 2.8 | **0.004** |
| Gargour, Hchichina | 991 | 3.073 | **0.006** | 996 | 1.665 | 0.12 |
| Gargour, Zarrat | 992 | 4.37 | **0.001** | 991 | 2.55 | **0.022** |
| Gargour, Djerba | 991 | 0.62 | 0.54 | 995 | 1.87 | **0.05** |
| Hchichina, Zarrat | 993 | 2.6 | **0.009** | 996 | 3.14 | **0.003** |
| Hchichina, Djerba | 996 | 2.13 | **0.05** | 991 | 2.71 | **0.004** |
| Zarrat, Djerba | 992 | 3.44 | **0.005** | 994 | 3.5 | **0.003** |

**Table S2** Inter-location correlation analysis (Pearson product-moment r) performed among the eight morphological parameters measured on *Ruditapes decussatus* from the five sampling locations. Significant correlations ( = 0.05) are reported in red. TW = total weight, SW shell weight, SWi = shell width, TL = total length, ST = shell thickness, DAM = distance between the anterior and posterior adductor muscle scar, LIS = length of inhalant siphon, LES = length of exhalant siphon.

| **Bizerte** | TW | SW | SWi | TL | ST | DAM | LIS |
| --- | --- | --- | --- | --- | --- | --- | --- |
| **TW** |  |  |  |  |  |  |  |
| SW | 0.98 |  |  |  |  |  |  |
| SWi | 0.94 | 0.95 |  |  |  |  |  |
| TL | 0.98 | 0.98 | 0.95 |  |  |  |  |
| ST | 0.96 | 0.96 | 0.92 | 0.95 |  |  |  |
| DAM | 0.78 | 0.82 | 0.75 | 0.79 | 0.81 |  |  |
| **LIS** | 0.11 | 0.14 | 0.16 | 0.11 | 0.15 | -0.01 |  |
| LES | 0.18 | 0.22 | 0.25 | 0.19 | 0.23 | 0.05 | 0.94 |
|  |  |  |  |  |  |  |  |
| **Gargour** |  |  |  |  |  |  |  |
| **TW** |  |  |  |  |  |  |  |
| SW | 0.99 |  |  |  |  |  |  |
| SWi | 0.96 | 0.95 |  |  |  |  |  |
| TL | 0.96 | 0.94 | 0.95 |  |  |  |  |
| ST | 0.96 | 0.95 | 0.91 | 0.91 |  |  |  |
| DAM | 0.89 | 0.87 | 0.83 | 0.87 | 0.80 |  |  |
| **LIS** | 0.24 | 0.25 | 0.28 | 0.31 | 0.24 | 0.22 |  |
| LES | 0.10 | 0.14 | 0.15 | 0.16 | 0.14 | 0.09 | 0.79 |
|  |  |  |  |  |  |  |  |
| **Hchichina** |  |  |  |  |  |  |  |
| **TW** |  |  |  |  |  |  |  |
| SW | 0.99 |  |  |  |  |  |  |
| SWi | 0.95 | 0.96 |  |  |  |  |  |
| TL | 0.96 | 0.97 | 0.97 |  |  |  |  |
| ST | 0.97 | 0.99 | 0.97 | 0.97 |  |  |  |
| DAM | 0.86 | 0.89 | 0.86 | 0.91 | 0.88 |  |  |
| **LIS** | 0.68 | 0.70 | 0.78 | 0.80 | 0.77 | 0.69 |  |
| LES | 0.74 | 0.75 | 0.83 | 0.84 | 0.82 | 0.73 | 0.97 |
|  |  |  |  |  |  |  |  |
| **Zarrat** |  |  |  |  |  |  |  |
| **TW** |  |  |  |  |  |  |  |
| SW | 0.99 |  |  |  |  |  |  |
| SWi | 0.72 | 0.75 |  |  |  |  |  |
| TL | 0.96 | 0.95 | 0.74 |  |  |  |  |
| ST | 0.89 | 0.89 | 0.76 | 0.93 |  |  |  |
| DAM | 0.84 | 0.82 | 0.59 | 0.88 | 0.81 |  |  |
| **LIS** | 0.22 | 0.24 | 0.34 | 0.30 | 0.36 | 0.19 |  |
| LES | 0.27 | 0.30 | 0.42 | 0.35 | 0.38 | 0.24 | 0.90 |
|  |  |  |  |  |  |  |  |
| **Djerba** |  |  |  |  |  |  |  |
| **TW** |  |  |  |  |  |  |  |
| SW | 0.97 |  |  |  |  |  |  |
| SWi | 0.89 | 0.88 |  |  |  |  |  |
| TL | 0.93 | 0.89 | 0.88 |  |  |  |  |
| ST | 0.93 | 0.92 | 0.84 | 0.84 |  |  |  |
| DAM | 0.76 | 0.72 | 0.71 | 0.78 | 0.67 |  |  |
| **LIS** | 0.19 | 0.16 | 0.27 | 0.25 | 0.19 | 0.13 |  |
| LES | -0.06 | -0.06 | -0.04 | -0.01 | -0.04 | -0.07 | 0.40 |

**Table S3** Summary of inter-location bivariate comparisons after PERMANOVA on morphological data (total wet weight and length of the inhalant siphon) of *Ruditapes decussatus*. Significant differences (Montecarlo *P*< 0.05) are reported in bold.

|  | **Macroelements** | | |
| --- | --- | --- | --- |
|  | Permutations | t | *P*(MC) |
| Bizerte, Gargour | 999 | 13.63 | **0.001** |
| Bizerte, Hchichina | 999 | 5.74 | **0.001** |
| Bizerte, Zarrat | 999 | 11.24 | **0.001** |
| Bizerte, Djerba | 998 | 14.48 | **0.001** |
| Gargour, Hchichina | 998 | 3.72 | **0.001** |
| Gargour, Zarrat | 999 | 3.01 | **0.001** |
| Gargour, Djerba | 998 | 8.72 | **0.001** |
| Hchichina, Zarrat | 999 | 2.79 | **0.006** |
| Hchichina, Djerba | 996 | 4.43 | **0.001** |
| Zarrat, Djerba | 999 | 4.65 | **0.001** |

**Table S4** Statistical significance of Spearman rank correlation coefficients (Rho) among macroelements and trace metals in sediments, the shells and soft tissues in *Ruditapes decussatus* specimens, and their morphological characteristics (TW = total wet weight; LIS = length of inhalant siphon)

|  |  | **Sediments** | | | | | |  | **Shells** | | | | |  | **Soft tissues** | | | | | |
| --- | --- | --- | --- | --- | --- | --- | --- | --- | --- | --- | --- | --- | --- | --- | --- | --- | --- | --- | --- | --- |
|  | **Element** | **Ca** | **Mg** | **Al** | **Fe** | **Pb** | **Zn** |  | **Ca** | **Mg** | **Al** | **Fe** | **Zn** |  | **Ca** | **Mg** | **Al** | **Fe** | **Pb** | **Zn** |
|  |  |  |  |  |  |  |  |  |  |  |  |  |  |  |  |  |  |  |  |  |
| **Sediments** | **Ca** |  |  |  |  |  |  |  |  |  |  |  |  |  |  |  |  |  |  |  |
| **Mg** | -0.30 |  |  |  |  |  |  |  |  |  |  |  |  |  |  |  |  |  |  |
| **Al** | -0.60 | 0.50 |  |  |  |  |  |  |  |  |  |  |  |  |  |  |  |  |  |
| **Fe** | -0.60 | 0.50 | 0.99 |  |  |  |  |  |  |  |  |  |  |  |  |  |  |  |  |
| **Pb** | -0.10 | 0.90 | 0.30 | 0.30 |  |  |  |  |  |  |  |  |  |  |  |  |  |  |  |
| **Zn** | -0.90 | 0.10 | 0.70 | 0.70 | 0.00 |  |  |  |  |  |  |  |  |  |  |  |  |  |  |
|  |  |  |  |  |  |  |  |  |  |  |  |  |  |  |  |  |  |  |  |  |
| **Shells** | **Ca** | 0.80 | -0.70 | -0.40 | -0.40 | -0.50 | -0.50 |  |  |  |  |  |  |  |  |  |  |  |  |  |
| **Mg** | -0.50 | 0.10 | 0.70 | 0.70 | 0.20 | 0.80 |  | -0.10 |  |  |  |  |  |  |  |  |  |  |  |
| **Al** | -0.10 | 0.60 | 0.70 | 0.70 | 0.70 | 0.30 |  | -0.10 | 0.70 |  |  |  |  |  |  |  |  |  |  |
| **Fe** | -0.70 | 0.20 | 0.90 | 0.90 | 0.10 | 0.90 |  | -0.30 | 0.90 | 0.60 |  |  |  |  |  |  |  |  |  |
| **Zn** | -0.50 | 0.10 | 0.70 | 0.70 | 0.20 | 0.80 |  | -0.10 | 0.99 | 0.70 | 0.90 |  |  |  |  |  |  |  |  |
|  |  |  |  |  |  |  |  |  |  |  |  |  |  |  |  |  |  |  |  |  |
| **Soft tissues** | **Ca** | 0.20 | -0.80 | -0.60 | -0.60 | -0.50 | 0.00 |  | 0.50 | 0.10 | -0.40 | -0.20 | 0.10 |  |  |  |  |  |  |  |
| **Mg** | 0.20 | -0.80 | -0.60 | -0.60 | -0.50 | 0.00 |  | 0.50 | 0.10 | -0.40 | -0.20 | 0.10 |  | 1.00 |  |  |  |  |  |
| **Al** | 0.50 | -0.60 | -0.70 | -0.70 | -0.20 | -0.30 |  | 0.60 | 0.00 | -0.20 | -0.40 | 0.00 |  | 0.90 | 0.90 |  |  |  |  |
| **Fe** | -0.30 | -0.70 | 0.10 | 0.10 | -0.60 | 0.60 |  | 0.30 | 0.60 | -0.10 | 0.50 | 0.60 |  | 0.70 | 0.70 | 0.40 |  |  |  |
| **Pb** | 0.10 | -0.10 | -0.70 | -0.70 | 0.20 | -0.20 |  | -0.10 | -0.20 | -0.30 | -0.50 | -0.20 |  | 0.60 | 0.60 | 0.70 | 0.00 |  |  |
| **Zn** | 0.10 | -0.90 | -0.30 | -0.30 | -0.70 | 0.20 |  | 0.60 | 0.30 | -0.30 | 0.10 | 0.30 |  | 0.90 | 0.90 | 0.70 | 0.90 | 0.20 |  |
|  |  |  |  |  |  |  |  |  |  |  |  |  |  |  |  |  |  |  |  |  |
|  | **TW** | 0.40 | 0.10 | -0.80 | -0.80 | 0.20 | -0.70 |  | -0.10 | -0.80 | -0.50 | -0.90 | -0.80 |  | 0.10 | 0.10 | 0.30 | -0.60 | 0.70 | -0.30 |
| **LIS** | -0.90 | -0.10 | 0.30 | 0.30 | -0.30 | 0.80 |  | -0.60 | 0.30 | -0.30 | 0.50 | 0.30 |  | 0.10 | 0.10 | -0.30 | 0.50 | 0.00 | 0.20 |
